# Supplementary material for: One-pot solvothermal synthesis of Cu-modified BiOCl via a Cu-containing ionic liquid and its visible-light photocatalytic properties
Source: Royal Society of Chemistry journal article supplement (doi:10.1039/c3ra45670f), 2014-01-01
Supplement: c3ra45670f1.pdf [file c3ra45670f1.pdf]

## **One-pot solvothermal synthesis of Cu-modified BiOCl via a Cu-containing ionic liquid and its visible-light photocatalytic properties**

Jun Di<sup>a</sup>, Jiexiang Xia<sup>a</sup>, Sheng Yin<sup>a</sup>, Hui Xu<sup>b</sup>, Li Xu<sup>c</sup>, Yuanguo Xu<sup>a</sup>, Minqiang He<sup>a</sup>, Huaming Li<sup>a,\*</sup>

<sup>a</sup>School of Chemistry and Chemical Engineering, Jiangsu University, 301 Xuefu Road, Zhenjiang, 212013, P. R. China

<sup>b</sup>School of the Environment, Jiangsu University, Zhenjiang 212013, P. R. China

<sup>c</sup>School of Material Science and Engineering, Jiangsu University, Zhenjiang, 212013, P. R. China

**\*Corresponding author:** Tel.: +86-511-88791108; Fax: +86-511-88791108;

E-mail address: lhm@ujs.edu.cn

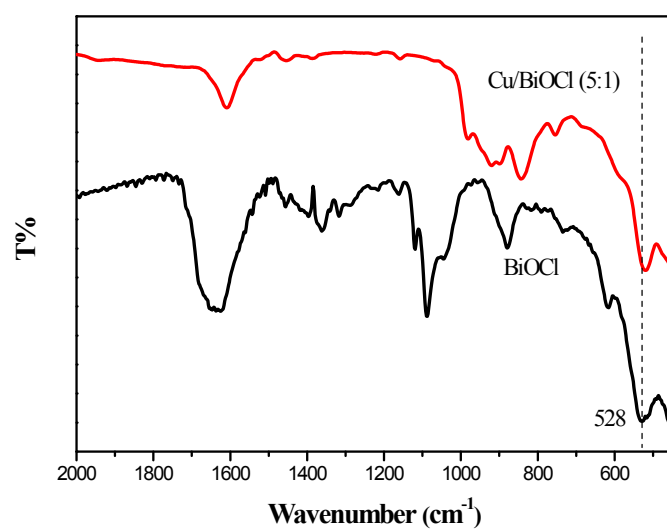

**Figure S1** FT-IR of Cu/BiOCl (5:1) and BiOCl materials.

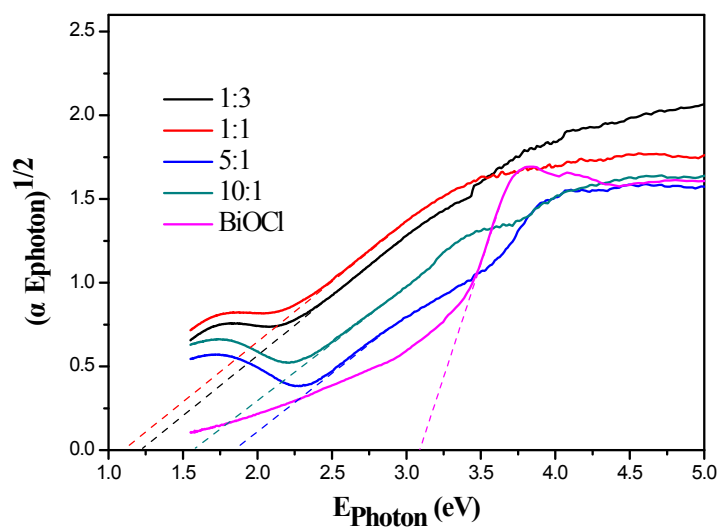

**Figure S2**  $(\alpha E_{\text{photon}})^{1/2}$  vs  $E_{\text{photon}}$  curves of the as-prepared samples.

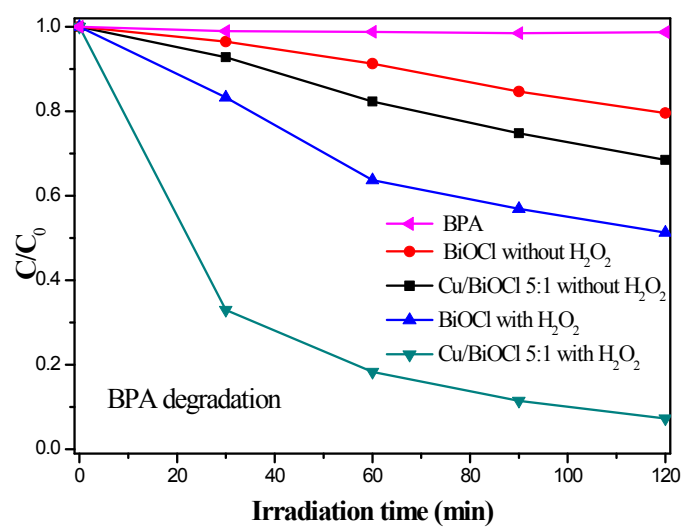

**Figure S3** Photocatalytic degradation of BPA in the presence of BiOCl, Cu/BiOCl (5:1) under visible light irradiation.

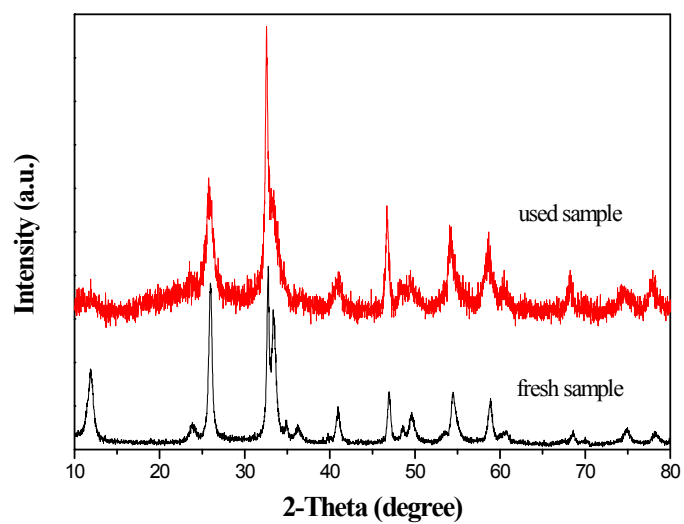

**Figure S4** XRD patterns of Cu/BiOCl (5:1) before and after the photocatalytic experiments.

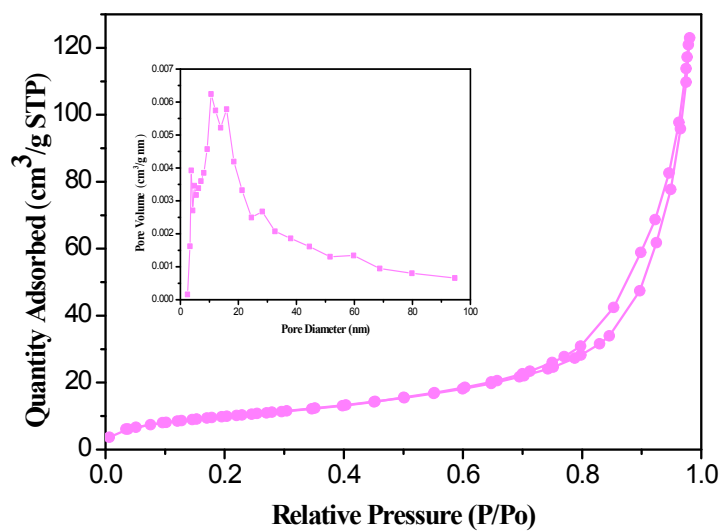

**Figure S5** Nitrogen adsorption-desorption isotherms of Cu/BiOCl (5:1) microspheres.

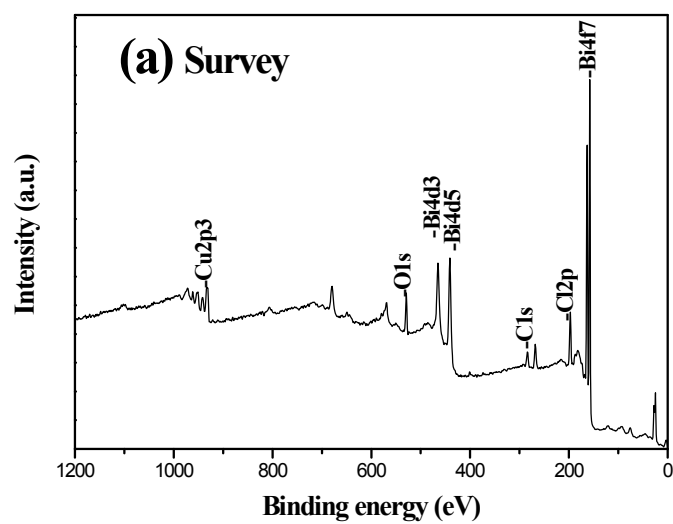

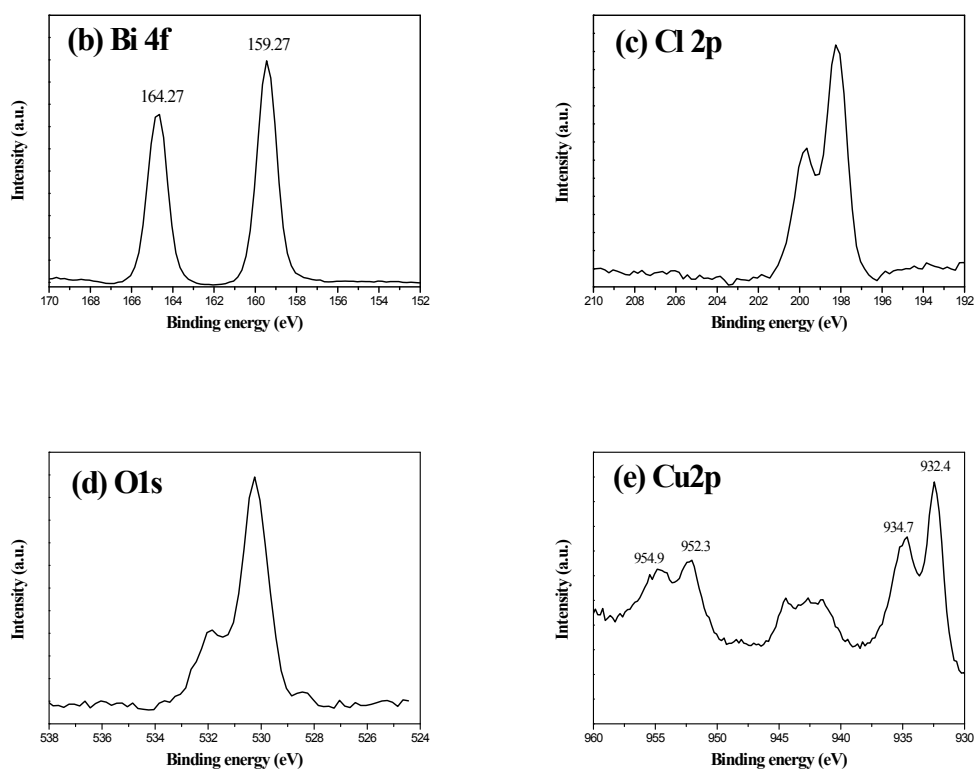

**Figure S6** XPS of Cu/BiOCl (5:1) after the photocatalytic experiments.

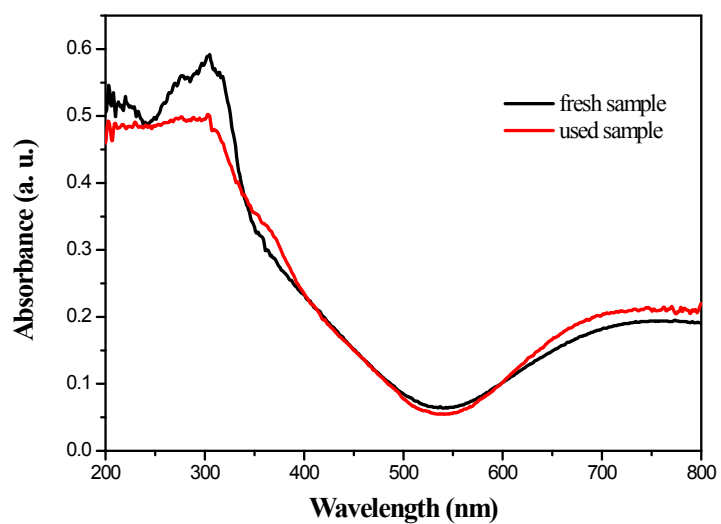

**Figure S7** UV-vis diffuse absorption spectra of the fresh and used Cu/BiOCl (5:1) samples.

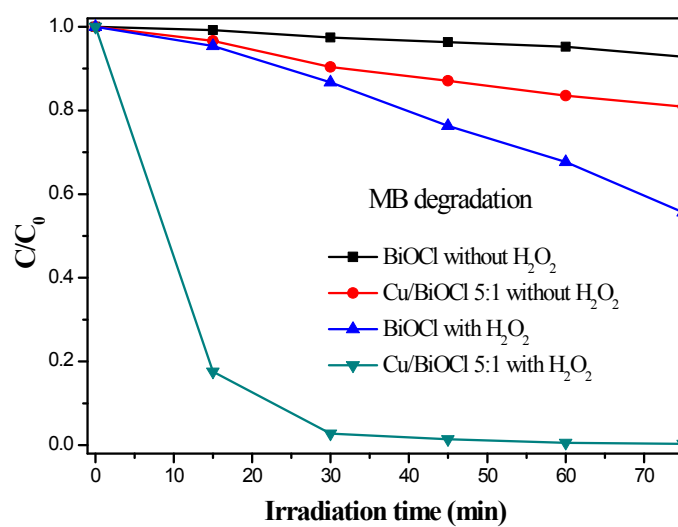

**Figure S8.** Photocatalytic degradation of MB in the presence of BiOCl, Cu/BiOCl (5:1) under visible light irradiation.
